# Supplementary material for: Deciphering genetic causes for sex differences in human health through drug metabolism and transporter genes
Source: PubMed Central journal article supplement (PMC9837057; doi:10.1038/s41467-023-35808-6), 2023-01-12
Supplement: 41467_2023_35808_MOESM3_ESM.pdf [file 41467_2023_35808_MOESM3_ESM.pdf]

## Description of Additional Supplementary Files

File Name: Supplementary Data 1

Description: DMET genes information

File Name: Supplementary Data 2

Description: List of Traits that included in analysis

File Name: Supplementary Data 3

Description: Sex differences of estimated heritability and genetic correlation in 564 traits

File Name: Supplementary Data 4

Description: Sex differences of estimated heritability in 1222 nonDMET traits

File Name: Supplementary Data 5

Description: Sex differential effect of cis-DMET genes variants in 564 traits

File Name: Supplementary Data 6

Description: Colocalization of sex heterogeneous SNPs in 13 traits

File Name: Supplementary Data 7

Description: Sex stratified cis-DMET eQTL analysis

File Name: Supplementary Data 8

Description: Colocalization of sex specific cis-eQTL with binary/categorical traits

File Name: Supplementary Data 9

Description: Colocalization of sex specific cis-eQTL with continuous variables traits

File Name: Supplementary Data 10

Description: Proportion of independent SNPs mapped into cis-DMET genes region (sex stratified & sex combined) in serum biomarker traits

File Name: Supplementary Data 11

Description: Sex differences of estimated heritability and genetic correlation in 30 serum biomarker traits

File Name: Supplementary Data 12

Description: Sex differential effect of cis-DMET genes variants in 30 serum biomarker traits

File Name: Supplementary Data 13

Description: Sex-specific causal relationships in MR test

File Name: Supplementary Data 14

Description: Sex-specific causal relationships in MR test (only cis-DMET genes SNP included)

File Name: Supplementary Data 15

Description: Sex differential DMET gene expression analysis in human liver

File Name: Supplementary Data 16

Description: Validation of 20 Sex DE genes

File Name: Supplementary Data 17

Description: Drugs annotated with sex differentially expressed genes in Drugbank and PharmGKB

File Name: Supplementary Data 18

Description: Summary of drugs reported with sex differences on PK/efficacy/toxicity

File Name: Supplementary Data 19

Description: Estimated heritability and genetic correlation of 11 traits using LogMM method

File Name: Supplementary Data 20

Description: Sex heterogeneous SNPs in 11 traits using LogMM method
